# Supplementary material for: Biomarker Candidates of Habitual Food Intake in a Swedish Cohort of Pregnant and Lactating Women and Their Infants
Source: MDPI journal article supplement (doi:10.3390/metabo14050256), 2024-04-29
Supplement: s1 [file s1]

Article

# Biomarker Candidates of Habitual Food Intake in a Swedish Cohort of Pregnant and Lactating Women and Their Infants

Mia Stråvik <sup>1,\*</sup>, Olle Hartvigsson <sup>1</sup>, Stefania Noerman <sup>1</sup>, Anna Sandin <sup>2</sup>, Agnes E. Wold <sup>3</sup>, Malin Barman <sup>1</sup> and Ann-Sofie Sandberg <sup>1</sup>

<sup>1</sup> Food and Nutrition Science, Department of Life Sciences, Chalmers University of Technology, 412 96 Gothenburg, Sweden; ann-sofie.sandberg@chalmers.se

<sup>2</sup> Pediatrics, Department of Clinical Science, Sunderby Research Unit, Umeå University, 901 87 Umeå, Sweden

<sup>3</sup> Department of Infectious Diseases, Institute of Biomedicine, Sahlgrenska Academy, University of Gothenburg, 413 90 Gothenburg, Sweden

\* Correspondence: mia.stravik@chalmers.se

## Content

**Table S1.** Features of interest for MSMS analysis.

**Figure S1.** Directed acyclic graph.

**Figure S1.** MSMS spectra matching for choline.

**Figure S2.** MSMS spectra matching for pipecolic acid.

**Figure S3.** MSMS spectra matching for indole-3-lactic acid.

**Figure S4.** MSMS spectra matching for CMPF.

**Figure S5.** MSMS spectra matching for proline betaine.

**Figure S6.** MSMS spectra matching for acetylcarnitine.

**Figure S7.** MSMS spectra matching for lutein.

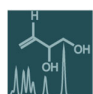

**Table S1.** Features of interest for MSMS analysis.

| Potential metabolite                   | mz               | rt               | Adduct                                                          | Mode     |
|----------------------------------------|------------------|------------------|-----------------------------------------------------------------|----------|
| <b>Pregnancy &amp; delivery</b>        |                  |                  |                                                                 |          |
| Anserine                               | 121.070002980776 | 43.5149993896484 | M+2H                                                            | Positive |
| Pipecolic acid                         | 130.084874061977 | 53.6369667053223 | M+H                                                             | Positive |
| Choline                                | 143.071942117219 | 146.512084960938 | M+K                                                             | Positive |
| Proline betaine                        | 144.100677933661 | 46.4918327331543 | M+H                                                             | Positive |
| Pipecolic acid                         | 147.112804007174 | 35.7742233276367 | M+NH <sub>4</sub>                                               | Positive |
| Indole-3-acetaldehyde                  | 177.101523417765 | 55.4220008850098 | M+NH <sub>4</sub>                                               | Positive |
| Proline betaine                        | 185.127041836108 | 141.155014038086 | M+ACN+H                                                         | Positive |
| Acetylcarnitine                        | 204.122894778965 | 47.6826438903809 | M+H                                                             | Positive |
| Carnosine                              | 227.110415556985 | 324.526000976562 | M+H                                                             | Positive |
| CMPF <sup>1</sup>                      | 241.109775710262 | 327.502990722656 | M+H                                                             | Positive |
| CMPF <sup>1</sup>                      | 263.089872705659 | 327.503021240234 | M+Na                                                            | Positive |
| Lutein                                 | 285.22476495678  | 427.208633422852 | M+2H                                                            | Positive |
| 3,3'-diindolylmethane                  | 288.15222712711  | 351.317016601562 | M+ACN+H                                                         | Positive |
| Phloretin                              | 307.120055349519 | 353.700042724609 | M+CH <sub>3</sub> OH+H                                          | Positive |
| Kaempferol                             | 319.081397751648 | 363.225006103516 | M+CH <sub>3</sub> OH+H                                          | Positive |
| Lutein                                 | 569.432313465669 | 468.609008789062 | M+H                                                             | Positive |
| Lutein                                 | 591.428029828622 | 408.471984863281 | M+Na                                                            | Positive |
| Lutein                                 | 601.471061770655 | 466.823059082031 | M+CH <sub>3</sub> OH+H                                          | Positive |
| Trimethylamine N-oxide                 | 76.0752816857054 | 42.3238182067871 | M+H                                                             | Positive |
| Ascorbic acid                          | 87.009312096435  | 52.5139427185059 | M-2H                                                            | Negative |
| Ascorbic acid                          | 157.011511330464 | 35.8087501525879 | M-H <sub>2</sub> O-H                                            | Negative |
| Proline betaine                        | 178.064127208162 | 45.9650001525879 | M+Cl                                                            | Negative |
| S-methylcysteine                       | 194.046294950205 | 285.766510009766 | M+Hac-H                                                         | Negative |
| Indole-3-lactic acid                   | 204.066708245801 | 222.788223266602 | M-H                                                             | Negative |
| Carnosine                              | 247.082009909926 | 301.536499023438 | M+Na-2H                                                         | Negative |
| Phloretin                              | 333.09181425996  | 285.901412963867 | M+Hac-H                                                         | Negative |
| <b>4 months postpartum<sup>2</sup></b> |                  |                  |                                                                 |          |
| Choline                                | 104.107121986718 | 40.8259963989258 | [M+H] <sup>+</sup> /[M] <sup>+</sup>                            | Positive |
| Pipecolic acid                         | 130.086400246006 | 55.4720458984375 | [M+H] <sup>+</sup>                                              | Positive |
| Proline betaine                        | 144.101857908248 | 46.318000793457  | [M+H] <sup>+</sup>                                              | Positive |
| S-methylcysteine                       | 177.070361094278 | 361.815002441406 | [M+H-<br>H <sub>2</sub> O] <sup>+</sup> /[M+ACN+H] <sup>+</sup> | Positive |
| 3-Methyl histidine                     | 192.07457785385  | 38.1227130889893 | [M+H] <sup>+</sup> /[M+Na] <sup>+</sup>                         | Positive |
| Acetylcarnitine                        | 204.123262821318 | 50.5887908935547 | [M+H] <sup>+</sup>                                              | Positive |
| 4-hydroxyphenylpyruvate                | 213.074734423396 | 37.7863998413086 | [M+H] <sup>+</sup> /[M+CH <sub>3</sub> OH+H] <sup>+</sup>       | Positive |
| CMPF <sup>1</sup>                      | 263.08981438261  | 325.809936523438 | [M+H] <sup>+</sup> /[M+Na] <sup>+</sup>                         | Positive |
| Zeaxanthin                             | 568.426551797752 | 465.572570800781 | [M+H] <sup>+</sup> /[M] <sup>+</sup>                            | Positive |
| Lutein                                 | 569.432313465669 | 468.609008789062 | M+H                                                             | Positive |
| CMPF <sup>1</sup>                      | 239.092153517623 | 330.2763671875   | [M-H] <sup>-</sup>                                              | Negative |

<sup>1</sup> 3-carboxy-4-methyl-5-propyl-2-furanpropanoic acid.

<sup>2</sup> The most probable mz corresponding to a cluster from RamClust in R.

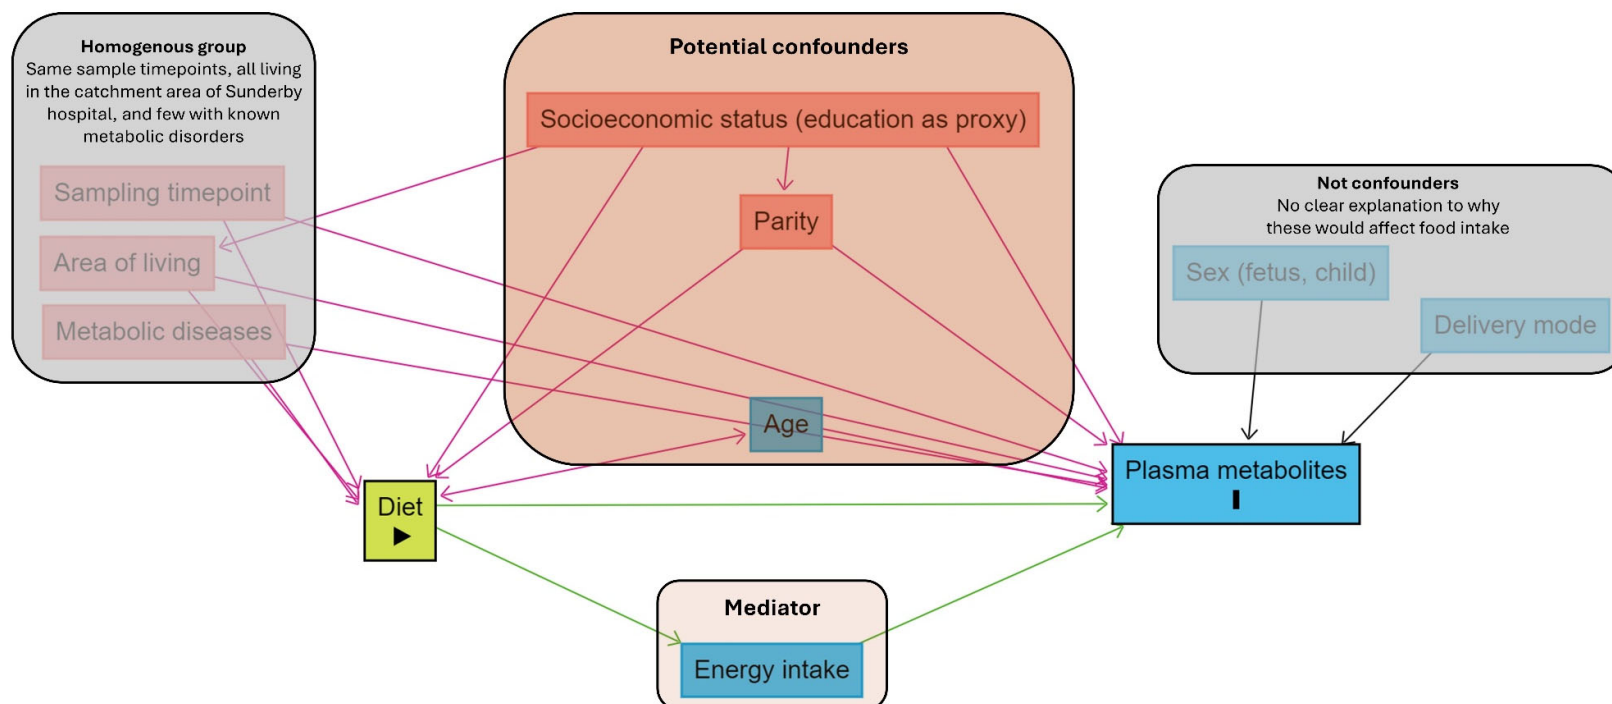

**Figure S1.** Directed acyclic graph.

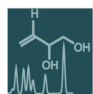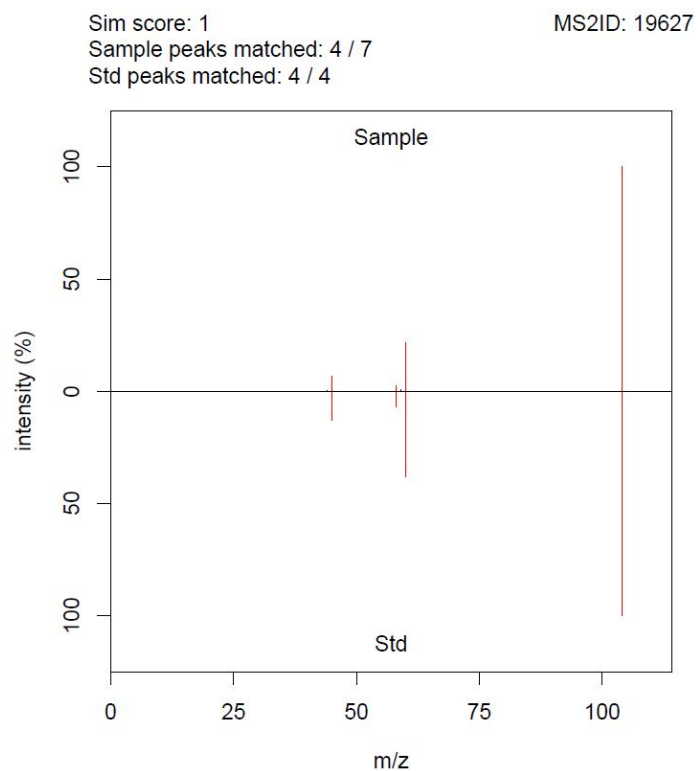

Figure S2. MSMS spectra matching for choline.

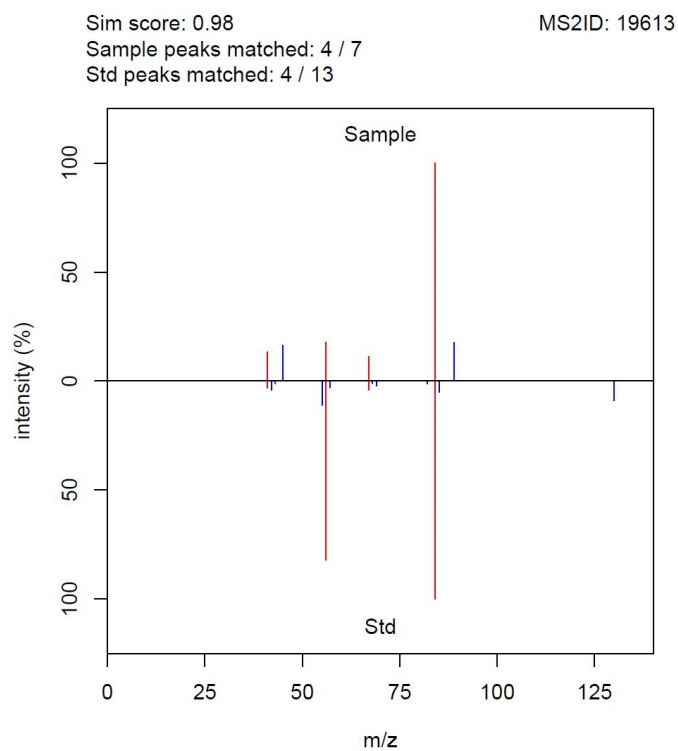

Figure S3. MSMS spectra matching for pipecolic acid.

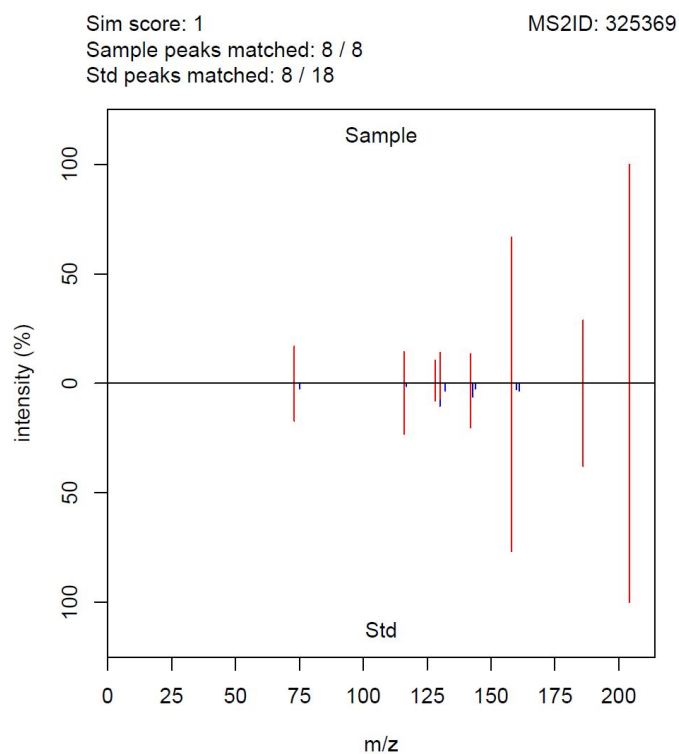

Figure S4. MSMS spectra matching for indole-3-lactic acid.

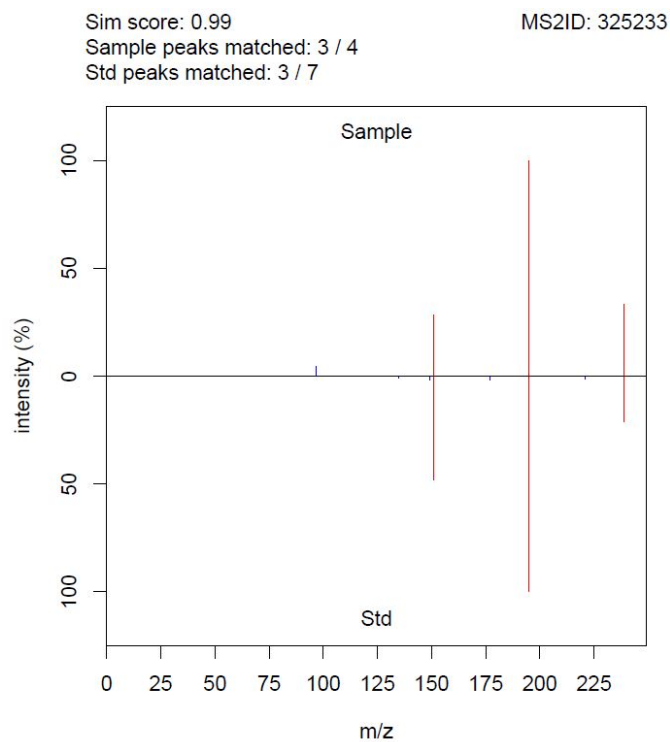

Figure S5. MSMS spectra matching for CMPF.



Sim score: 0.98  
Sample peaks matched: 18 / 22  
Std peaks matched: 18 / 27

MS2ID: 19544

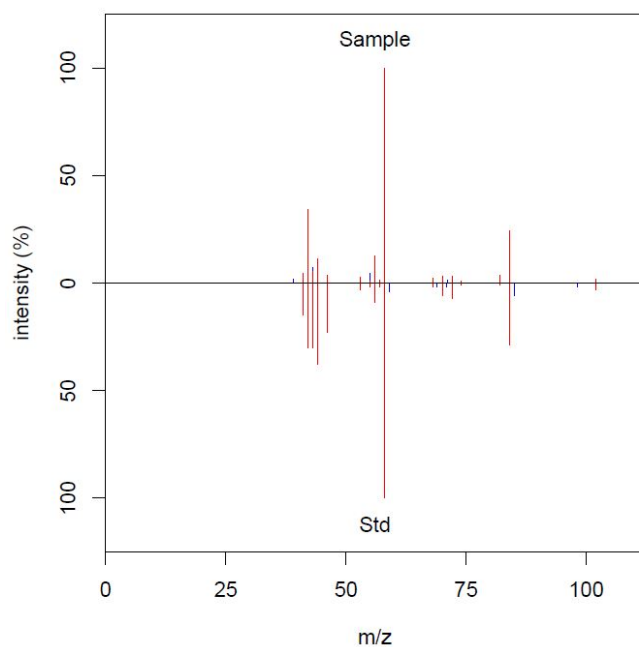

Figure S6. MSMS spectra matching for proline betaine.

Sim score: 1  
Sample peaks matched: 5 / 5  
Std peaks matched: 5 / 26

MS2ID: 19343

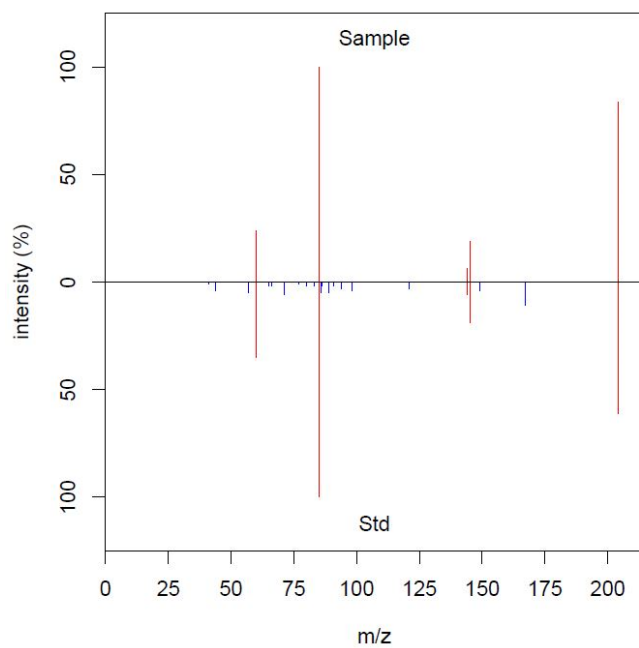

Figure S7. MSMS spectra matching for acetylcarnitine.

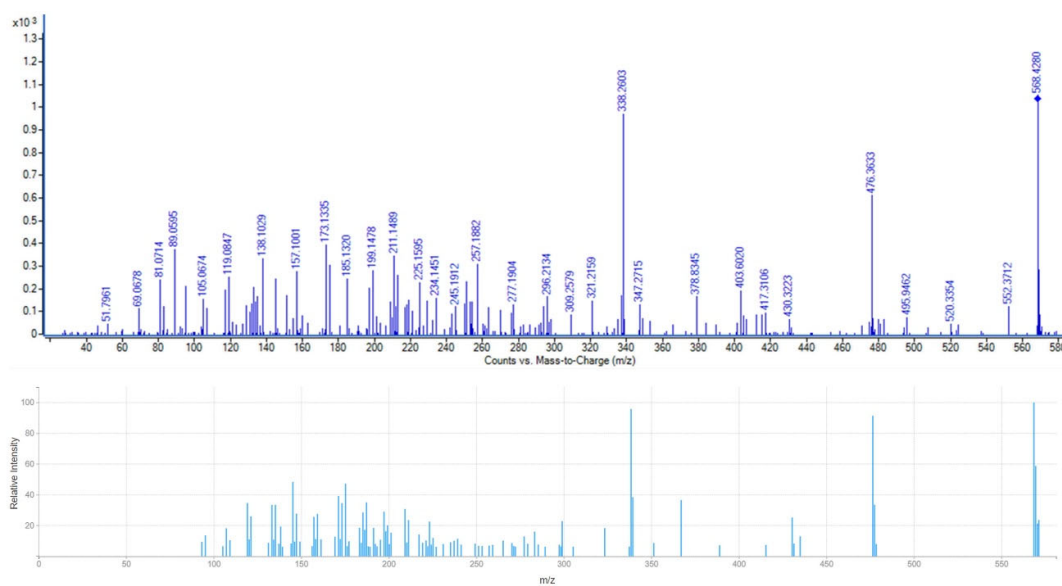

**Figure S8.** MS/MS spectra matching for lutein. Matching was done after a manual check against HMDB spectral library. The reference spectra (bottom image) can be found at: [https://hmdb.ca/spectra/ms\\_ms/2228168](https://hmdb.ca/spectra/ms_ms/2228168).
